# Supplementary material for: Use of hormone replacement therapy and risk of venous thromboembolism: nested case-control studies using the QResearch and CPRD databases
Source: PubMed Central journal article supplement (PMC6326068; doi:10.1136/bmj.k4810), 2019-01-09
Supplement: viny046401.ww.pdf [file viny046401.ww.pdf]

# Use of hormone replacement therapy and risk of venous thromboembolism: two nested case-control studies in primary care

## Supplementary tables

|                                                                                                                                                                                                                                                                              |    |
|------------------------------------------------------------------------------------------------------------------------------------------------------------------------------------------------------------------------------------------------------------------------------|----|
| eTable 1 Characteristics in cases and controls at or before the index date across the databases by exposure to HRT .....                                                                                                                                                     | 3  |
| eTable 2 <b>All cases and controls:</b> Odds ratios for age-practice matched cases and controls for any HRT exposure.....                                                                                                                                                    | 5  |
| eTable 3 Proportion (number) of cases and controls prescribed different regimens of oral HRT, across both databases .....                                                                                                                                                    | 6  |
| eTable 4 <b>All cases and controls:</b> Duration of use for different types of HRT with sufficient number of observation by database .....                                                                                                                                   | 7  |
| eTable 5 <b>All cases and controls:</b> Past use (91-365 days before the index date) of different oestrogen and progestogens, number of cases and controls and adjusted odds ratios by database and combined analysis .....                                                  | 8  |
| eTable 6 <b>Cases and controls without previous anticoagulant prescription:</b> Numbers of cases and controls and adjusted odds ratios by database and combined odds ratios .....                                                                                            | 9  |
| eTable 7 <b>Cases and controls with data linked to hospital and mortality data:</b> Numbers of cases and controls and adjusted odds ratios by database and combined odds ratios .....                                                                                        | 10 |
| eTable 8 <b>Cases and controls with complete data for body-mass index, smoking status and alcohol consumption:</b> Numbers of cases and controls and adjusted odds ratios by database and combined odds ratios .....                                                         | 11 |
| eTable 9 <b>Cases restricted to patients with a diagnosis of VTE on hospital or mortality records, or with associated anticoagulant prescriptions, and their controls:</b> Numbers of cases and controls and adjusted odds ratios by database and combined odds ratios ..... | 12 |
| eTable 10 <b>Cases and controls without chronic conditions or recent medical events:</b> Numbers of cases and controls and adjusted odds ratios by database and combined odds ratios .....                                                                                   | 13 |
| eTable 11 <b>Cases and controls aged 40 to 54:</b> Numbers of cases and controls and adjusted odds ratios by database and combined odds ratios.....                                                                                                                          | 14 |
| eTable 12 <b>Cases and controls aged 55 to 64:</b> Numbers of cases and controls and adjusted odds ratios by database and combined odds ratios.....                                                                                                                          | 15 |
| eTable 13 <b>Cases and controls aged 65 to 79:</b> Numbers of cases and controls and adjusted odds ratios by database and combined odds ratios.....                                                                                                                          | 16 |
| eTable 14 <b>Cases and controls with body mass index &lt; 25kg/m<sup>2</sup>:</b> Numbers of cases and controls and adjusted odds ratios by database and combined odds ratios .....                                                                                          | 17 |
| eTable 15 <b>Cases and controls with body mass index 25 to 30kg/m<sup>2</sup>:</b> Numbers of cases and controls and adjusted odds ratios by database and combined odds ratios .....                                                                                         | 18 |
| eTable 16 <b>Cases and controls with body mass index &gt; 30kg/m<sup>2</sup>:</b> Numbers of cases and controls and adjusted odds ratios by database and combined odds ratios .....                                                                                          | 19 |

eFigure 1 HRT preparations available in the UK and the number of controls from both databases

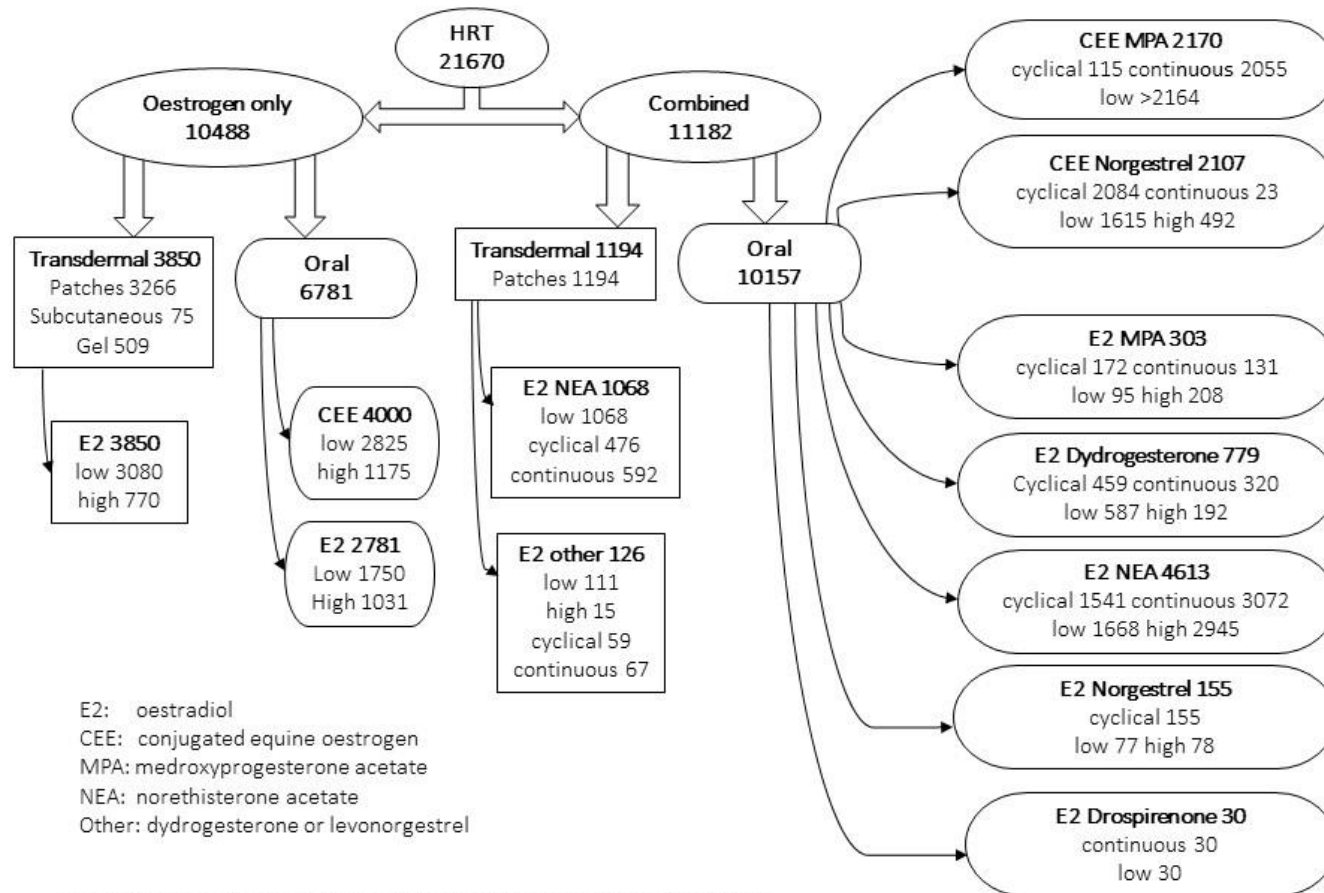

E2: oestradiol  
 CEE: conjugated equine oestrogen  
 MPA: medroxyprogesterone acetate  
 NEA: norethisterone acetate  
 Other: dydrogesterone or levonorgestrel

Note: Some treatments comprised tablets *and* patches. 143 women in the Oestrogen-only group and 169 in the Combined group were prescribed these.

eTable 1 Characteristics in cases and controls at or before the index date across the databases by exposure to HRT

|                                | No HRT       |                 | Oral HRT     |                 | Transdermal HRT |                 |
|--------------------------------|--------------|-----------------|--------------|-----------------|-----------------|-----------------|
|                                | Cases; % (N) | Controls; % (N) | Cases; % (N) | Controls; % (N) | Cases; % (N)    | Controls; % (N) |
| Total                          | 74601        | 369824          | 4915         | 16938           | 982             | 5044            |
| <b>Age in years</b>            |              |                 |              |                 |                 |                 |
| 40 to 54                       | 22.2 (16585) | 22.4 (82899)    | 34.8 (1711)  | 33.3 (5639)     | 36.6 (359)      | 31.2 (1572)     |
| 55 to 64                       | 21.3 (15861) | 21.6 (79848)    | 42.6 (2094)  | 42.8 (7244)     | 36.5 (358)      | 40.9 (2064)     |
| 65 to 79                       | 56.5 (42155) | 56.0 (207077)   | 22.6 (1110)  | 23.9 (4055)     | 27.0 (265)      | 27.9 (1408)     |
| <b>Ethnic group: non-white</b> |              |                 |              |                 |                 |                 |
|                                | 4.4 (3257)   | 4.8 (17771)     | 1.8 (89)     | 2.0 (344)       | 1.8 (18)        | 2.1 (107)       |
| <b>Body mass index</b>         |              |                 |              |                 |                 |                 |
| 15 to 24 kg/m <sup>2</sup>     | 23.8 (17752) | 33.0 (122106)   | 29.1 (1432)  | 41.7 (7069)     | 30.3 (298)      | 39.2 (1976)     |
| 25 to 29 kg/m <sup>2</sup>     | 28.0 (20859) | 29.8 (110278)   | 30.8 (1515)  | 29.8 (5055)     | 30.4 (299)      | 31.7 (1600)     |
| 30 kg/m <sup>2</sup> and over  | 35.9 (26748) | 23.3 (86206)    | 28.8 (1417)  | 16.6 (2819)     | 28.2 (277)      | 17.6 (889)      |
| not recorded                   | 9.5 (7110)   | 10.2 (37642)    | 8.0 (395)    | 8.9 (1507)      | 8.5 (83)        | 8.9 (449)       |
| <b>Smoking</b>                 |              |                 |              |                 |                 |                 |
| none                           | 46.7 (34853) | 49.7 (183961)   | 43.6 (2142)  | 45.0 (7621)     | 43.3 (425)      | 47.1 (2374)     |
| ex                             | 32.6 (24311) | 29.6 (109349)   | 30.1 (1479)  | 29.1 (4924)     | 30.4 (299)      | 31.1 (1567)     |
| light                          | 8.1 (6049)   | 7.4 (27494)     | 9.5 (467)    | 9.6 (1622)      | 10.2 (100)      | 8.5 (430)       |
| moderate                       | 4.7 (3469)   | 4.6 (16891)     | 5.8 (286)    | 6.3 (1073)      | 6.1 (60)        | 5.5 (277)       |
| heavy                          | 3.3 (2431)   | 2.7 (9824)      | 5.9 (289)    | 4.9 (837)       | 4.6 (45)        | 3.5 (177)       |
| not recorded                   | 4.7 (3488)   | 6.0 (22305)     | 5.1 (252)    | 5.1 (861)       | 5.4 (53)        | 4.3 (219)       |
| <b>Alcohol</b>                 |              |                 |              |                 |                 |                 |
| none                           | 29.9 (22278) | 26.3 (97156)    | 24.1 (1186)  | 21.0 (3561)     | 24.6 (242)      | 20.7 (1044)     |
| ex-use                         | 9.2 (6879)   | 7.8 (28690)     | 6.8 (333)    | 5.7 (961)       | 7.1 (70)        | 5.5 (278)       |
| trivial                        | 30.5 (22730) | 31.9 (118022)   | 35.3 (1735)  | 35.6 (6025)     | 34.9 (343)      | 36.3 (1832)     |
| light                          | 10.2 (7597)  | 12.2 (45113)    | 12.4 (609)   | 15.1 (2564)     | 12.4 (122)      | 16.0 (808)      |

|                                              |              |               |             |             |            |             |
|----------------------------------------------|--------------|---------------|-------------|-------------|------------|-------------|
| moderate                                     | 5.4 (4051)   | 6.3 (23248)   | 7.4 (365)   | 8.2 (1381)  | 8.0 (79)   | 7.6 (381)   |
| heavy                                        | 0.6 (421)    | 0.5 (1702)    | 0.4 (21)    | 0.5 (80)    | 0.7 (7)    | 0.4 (20)    |
| very heavy                                   | 0.4 (285)    | 0.2 (889)     | 0.3 (17)    | 0.2 (33)    | 0.3 (3)    | 0.2 (9)     |
| not recorded                                 | 13.9 (10360) | 14.9 (55004)  | 13.2 (649)  | 13.8 (2333) | 11.8 (116) | 13.3 (672)  |
| <b>Morbidities</b>                           | 57.1 (42617) | 36.1 (133327) | 45.4 (2232) | 29.5 (5003) | 52.1 (512) | 33.0 (1663) |
| asthma                                       | 15.6 (11667) | 11.3 (41935)  | 18.6 (912)  | 13.2 (2230) | 18.4 (181) | 13.8 (697)  |
| atrial fibrillation                          | 3.6 (2675)   | 2.6 (9790)    | 1.5 (75)    | 1.0 (173)   | 2.2 (22)   | 1.3 (68)    |
| cancer                                       | 21.7 (16196) | 7.0 (25792)   | 9.9 (486)   | 3.0 (503)   | 14.4 (141) | 4.0 (200)   |
| cardiovascular disease                       | 13.6 (10147) | 9.4 (34857)   | 8.0 (391)   | 4.9 (826)   | 10.3 (101) | 5.8 (293)   |
| COPD                                         | 7.1 (5280)   | 3.9 (14304)   | 5.1 (253)   | 2.7 (457)   | 4.3 (42)   | 2.5 (127)   |
| chronic renal disease                        | 8.9 (6605)   | 5.7 (20987)   | 3.3 (162)   | 1.6 (279)   | 4.3 (42)   | 2.0 (102)   |
| congestion cardiac failure                   | 3.1 (2341)   | 1.5 (5482)    | 1.5 (75)    | 0.5 (86)    | 1.5 (15)   | 0.6 (29)    |
| Inflammatory bowel disease                   | 1.7 (1282)   | 1.0 (3551)    | 1.8 (90)    | 1.0 (175)   | 2.3 (23)   | 1.2 (61)    |
| rheumatoid arthritis                         | 3.8 (2805)   | 2.0 (7400)    | 4.2 (207)   | 2.0 (337)   | 4.1 (40)   | 2.3 (118)   |
| SLE                                          | 0.4 (307)    | 0.2 (617)     | 0.5 (23)    | 0.2 (29)    | 1.0 (10)   | 0.5 (24)    |
| varicose veins                               | 7.2 (5345)   | 5.2 (19114)   | 7.4 (363)   | 6.4 (1081)  | 10.7 (105) | 7.4 (374)   |
|                                              |              |               |             |             |            |             |
| <b>Recent events</b>                         | 26.7 (19906) | 11.4 (42010)  | 24.6 (1210) | 13.2 (2237) | 26.7 (262) | 13.8 (697)  |
| respiratory infection                        | 12.7 (9497)  | 6.5 (24206)   | 15.6 (766)  | 9.1 (1546)  | 17.1 (168) | 8.6 (436)   |
| urinary infection                            | 7.0 (5222)   | 3.7 (13541)   | 5.5 (271)   | 3.4 (582)   | 5.5 (54)   | 4.5 (229)   |
| <b>Other characteristics</b>                 |              |               |             |             |            |             |
| oophorectomy/hysterectomy                    | 27.5 (20482) | 22.7 (84098)  | 44.5 (2185) | 43.0 (7278) | 72.7 (714) | 67.5 (3407) |
| <b>Other medications in the last 90 days</b> |              |               |             |             |            |             |
| aspirin                                      | 14.1 (10497) | 11.3 (41607)  | 8.0 (391)   | 6.1 (1036)  | 9.0 (88)   | 6.6 (333)   |
| antidepressants                              | 23.1 (17268) | 13.5 (50050)  | 29.7 (1461) | 19.5 (3298) | 30.0 (295) | 20.7 (1045) |
| antipsychotics                               | 3.4 (2531)   | 1.1 (4186)    | 2.7 (133)   | 1.0 (170)   | 3.3 (32)   | 1.0 (49)    |

eTable 2 All cases and controls: Odds ratios for age-practice matched cases and controls for any HRT exposure.

|                                    | <b>QResearch</b>                 | <b>CPRD</b>                      | <b>Combined analysis</b>                  |         |
|------------------------------------|----------------------------------|----------------------------------|-------------------------------------------|---------|
|                                    | Unadjusted Odds ratio<br>(95%CI) | Unadjusted Odds ratio<br>(95%CI) | Combined unadjusted Odds<br>ratio (95%CI) | p-value |
| <b>ANY HRT</b>                     | 1.35 (1.30 to 1.40)              | 1.37 (1.30 to 1.44)              | 1.36 (1.31 to 1.40)                       | <0.001  |
| <b>ORAL PREPARATIONS</b>           | 1.48 (1.42 to 1.54)              | 1.45 (1.37 to 1.54)              | 1.47 (1.42 to 1.52)                       | <0.001  |
| <b>Oestrogen-only</b>              | 1.47 (1.38 to 1.57)              | 1.46 (1.33 to 1.59)              | 1.47 (1.39 to 1.54)                       | <0.001  |
| CEE                                | 1.52 (1.40 to 1.65)              | 1.53 (1.37 to 1.71)              | 1.53 (1.43 to 1.63)                       | <0.001  |
| E2                                 | 1.40 (1.27 to 1.55)              | 1.35 (1.17 to 1.55)              | 1.38 (1.27 to 1.50)                       | <0.001  |
| <b>Combined with progestogen</b>   | 1.49 (1.41 to 1.57)              | 1.45 (1.35 to 1.57)              | 1.48 (1.41 to 1.54)                       | <0.001  |
| <b>CEE combined</b>                | 1.63 (1.51 to 1.76)              | 1.59 (1.43 to 1.78)              | 1.62 (1.52 to 1.72)                       | <0.001  |
| CEE MPA                            | 1.84 (1.65 to 2.04)              | 1.55 (1.33 to 1.80)              | 1.74 (1.59 to 1.89)                       | <0.001  |
| CEE Norgestrel                     | 1.42 (1.27 to 1.59)              | 1.64 (1.41 to 1.91)              | 1.50 (1.37 to 1.64)                       | <0.001  |
| <b>E2 combined</b>                 | 1.39 (1.29 to 1.49)              | 1.35 (1.22 to 1.49)              | 1.37 (1.30 to 1.46)                       | <0.001  |
| E2 MPA                             | 1.29 (0.94 to 1.77)              | 1.10 (0.70 to 1.72)              | 1.22 (0.95 to 1.58)                       | 0.1     |
| E2 Dydrogesterone                  | 1.01 (0.81 to 1.25)              | 0.95 (0.70 to 1.29)              | 0.99 (0.83 to 1.18)                       | 0.9     |
| E2 Norethisterone                  | 1.47 (1.36 to 1.59)              | 1.44 (1.29 to 1.60)              | 1.46 (1.37 to 1.56)                       | <0.001  |
| E2 other progestogens <sup>†</sup> | 1.08 (0.72 to 1.61)              | 1.31 (0.70 to 2.45)              | 1.14 (0.81 to 1.60)                       | 0.4     |
| <b>Regimen</b>                     |                                  |                                  |                                           |         |
| Combined cyclical                  | 1.32 (1.21 to 1.43)              | 1.45 (1.30 to 1.63)              | 1.36 (1.27 to 1.46)                       | <0.001  |
| Combined continuous                | 1.63 (1.52 to 1.75)              | 1.45 (1.32 to 1.60)              | 1.57 (1.48 to 1.66)                       | <0.001  |
| E2 Dydrogesterone cyclical         | 1.05 (0.80 to 1.39)              | 1.02 (0.69 to 1.51)              | 1.04 (0.83 to 1.30)                       | 0.7     |
| E2 Dydrogesterone continuous       | 0.93 (0.66 to 1.32)              | 0.86 (0.53 to 1.39)              | 0.91 (0.68 to 1.20)                       | 0.5     |
| E2 Norethisterone cyclical         | 1.30 (1.13 to 1.49)              | 1.38 (1.13 to 1.68)              | 1.32 (1.18 to 1.48)                       | <0.001  |
| E2 Norethisterone continuous       | 1.57 (1.43 to 1.72)              | 1.46 (1.29 to 1.65)              | 1.53 (1.42 to 1.65)                       | <0.001  |
| <b>Oral oestrogen dose</b>         |                                  |                                  |                                           |         |
| CEE ≤0.625mg                       | 1.34 (1.21 to 1.48)              | 1.46 (1.27 to 1.68)              | 1.38 (1.27 to 1.50)                       | <0.001  |
| CEE >0.625mg                       | 2.01 (1.75 to 2.31)              | 1.69 (1.40 to 2.04)              | 1.89 (1.69 to 2.11)                       | <0.001  |
| E2 ≤1mg                            | 1.30 (1.14 to 1.48)              | 1.30 (1.09 to 1.57)              | 1.30 (1.17 to 1.44)                       | <0.001  |
| E2 >1mg                            | 1.58 (1.35 to 1.85)              | 1.41 (1.14 to 1.76)              | 1.52 (1.34 to 1.73)                       | <0.001  |
| CEE ≤0.625mg Norgestrel            | 1.28 (1.11 to 1.46)              | 1.36 (1.13 to 1.63)              | 1.30 (1.17 to 1.46)                       | <0.001  |
| CEE >0.625mg Norgestrel            | 1.92 (1.56 to 2.37)              | 2.61 (1.99 to 3.41)              | 2.16 (1.83 to 2.55)                       | <0.001  |
| E2 ≤1mg Dydrogesterone             | 0.93 (0.72 to 1.21)              | 0.88 (0.62 to 1.25)              | 0.91 (0.74 to 1.13)                       | 0.4     |

|                                   |                     |                     |                     |        |
|-----------------------------------|---------------------|---------------------|---------------------|--------|
| E2 >1mg Dydrogesterone            | 1.21 (0.82 to 1.78) | 1.22 (0.68 to 2.20) | 1.21 (0.87 to 1.68) | 0.2    |
| E2 ≤1mg Norethisterone            | 1.15 (1.00 to 1.32) | 1.20 (1.00 to 1.44) | 1.17 (1.04 to 1.31) | 0.008  |
| E2 >1mg Norethisterone            | 1.66 (1.51 to 1.82) | 1.58 (1.38 to 1.79) | 1.63 (1.51 to 1.76) | <0.001 |
| <b>TRANSDERMAL PREPARATIONS</b>   | 0.90 (0.83 to 0.98) | 1.04 (0.93 to 1.18) | 0.95 (0.88 to 1.02) | 0.1    |
| E2 only                           | 0.95 (0.87 to 1.05) | 1.08 (0.94 to 1.23) | 1.00 (0.92 to 1.08) | 0.9    |
| E2 combined                       | 0.76 (0.63 to 0.91) | 0.94 (0.71 to 1.23) | 0.81 (0.70 to 0.94) | 0.006  |
| combined cyclical                 | 0.77 (0.59 to 1.00) | 0.81 (0.52 to 1.29) | 0.78 (0.62 to 0.98) | 0.03   |
| combined continuous               | 0.75 (0.59 to 0.97) | 1.00 (0.71 to 1.40) | 0.83 (0.68 to 1.02) | 0.08   |
| <b>Transdermal oestrogen dose</b> |                     |                     |                     |        |
| E2 ≤50mcg                         | 0.90 (0.81 to 1.00) | 1.02 (0.88 to 1.19) | 0.94 (0.86 to 1.03) | 0.2    |
| E2 >50mcg                         | 1.18 (0.97 to 1.44) | 1.32 (1.00 to 1.74) | 1.23 (1.05 to 1.44) | 0.01   |
| <b>OTHER MENOPAUSAL TREATMENT</b> |                     |                     |                     |        |
| Tibolone                          | 0.95 (0.82 to 1.10) | 1.06 (0.88 to 1.27) | 0.99 (0.89 to 1.11) | 0.9    |
| Raloxifene                        | 1.38 (1.12 to 1.70) | 1.51 (1.14 to 1.99) | 1.42 (1.20 to 1.68) | <0.001 |
| CEE cream                         | 0.85 (0.54 to 1.34) | 1.08 (0.73 to 1.60) | 0.97 (0.72 to 1.31) | 0.9    |
| E2 vaginal                        | 0.80 (0.64 to 1.01) | 0.85 (0.73 to 0.99) | 0.84 (0.74 to 0.95) | 0.006  |

†other progestogens include norgestrel/levonorgestrel and drospirenone

*eTable 3 Proportion (number) of cases and controls prescribed different regimens of oral HRT, across both databases*

| age group | Oestrogen only |            | Combined cyclical |            | Combined continuous |            |
|-----------|----------------|------------|-------------------|------------|---------------------|------------|
|           | Cases          | Controls   | Cases             | Controls   | Cases               | Controls   |
| 40-54     | 4.2 (783)      | 2.5 (2292) | 3.7 (686)         | 2.8 (2518) | 1.8 (340)           | 1.3 (1149) |
| 55-64     | 4.8 (870)      | 3.7 (3311) | 2.1 (384)         | 1.7 (1512) | 5.7 (1045)          | 3.8 (3367) |
| 65-79     | 1.5 (664)      | 1.3 (2815) | 0.3 (128)         | 0.2 (496)  | 1.3 (563)           | 0.9 (1968) |

eTable 4 All cases and controls: Duration of use for different types of HRT with sufficient number of observation by database

|                                 | QResearch               |                                                     | CPRD                    |                                                     | Combined analysis                                   |         |
|---------------------------------|-------------------------|-----------------------------------------------------|-------------------------|-----------------------------------------------------|-----------------------------------------------------|---------|
|                                 | N of cases/<br>controls | Adjusted odds ratio<br>(95% confidence<br>interval) | N of cases/<br>controls | Adjusted odds ratio<br>(95% confidence<br>interval) | Combined odds ratio<br>(95% confidence<br>interval) | P-value |
| <b>Oral preparations</b>        |                         |                                                     |                         |                                                     |                                                     |         |
| CEE <=84ds                      | 79 / 215                | 1.87 (1.41 to 2.47)                                 | 36 / 90                 | 1.98 (1.30 to 3.02)                                 | 1.90 (1.51 to 2.40)                                 | <0.001  |
| CEE >84ds                       | 707 / 2477              | 1.47 (1.34 to 1.61)                                 | 386 / 1218              | 1.44 (1.27 to 1.64)                                 | 1.46 (1.35 to 1.57)                                 | <0.001  |
| CEE MPA <=84ds                  | 40 / 172                | 1.44 (1.00 to 2.08)                                 | 21 / 61                 | 1.79 (1.03 to 3.10)                                 | 1.54 (1.13 to 2.09)                                 | 0.006   |
| CEE MPA >84ds                   | 461 / 1266              | 2.33 (2.07 to 2.61)                                 | 218 / 671               | 1.87 (1.58 to 2.22)                                 | 2.17 (1.97 to 2.39)                                 | <0.001  |
| CEE Norgestrel <=84ds           | 43 / 130                | 1.91 (1.33 to 2.76)                                 | 23 / 53                 | 2.37 (1.40 to 4.01)                                 | 2.05 (1.52 to 2.77)                                 | <0.001  |
| CEE Norgestrel >84ds            | 339 / 1302              | 1.56 (1.37 to 1.77)                                 | 209 / 622               | 1.97 (1.66 to 2.34)                                 | 1.69 (1.53 to 1.88)                                 | <0.001  |
| E2 <=84ds                       | 56 / 212                | 1.13 (0.82 to 1.55)                                 | 29 / 78                 | 1.64 (1.02 to 2.65)                                 | 1.27 (0.97 to 1.65)                                 | 0.08    |
| E2 >84ds                        | 455 / 1664              | 1.33 (1.19 to 1.49)                                 | 231 / 827               | 1.16 (0.98 to 1.36)                                 | 1.27 (1.16 to 1.40)                                 | <0.001  |
| E2 NEA <=84ds                   | 96 / 339                | 1.59 (1.24 to 2.03)                                 | 49 / 181                | 1.33 (0.93 to 1.91)                                 | 1.50 (1.23 to 1.84)                                 | <0.001  |
| E2 NEA >84ds                    | 752 / 2704              | 1.71 (1.56 to 1.86)                                 | 418 / 1389              | 1.69 (1.49 to 1.92)                                 | 1.70 (1.58 to 1.83)                                 | <0.001  |
| <b>Transdermal preparations</b> |                         |                                                     |                         |                                                     |                                                     |         |
| Oestrogen only <=84ds           | 41 / 218                | 0.82 (0.57 to 1.17)                                 | 55 / 261                | 1.04 (0.76 to 1.43)                                 | 0.94 (0.74 to 1.19)                                 | 0.6     |
| Oestrogen only >84ds            | 462 / 2427              | 0.95 (0.86 to 1.06)                                 | 223 / 943               | 0.98 (0.83 to 1.15)                                 | 0.96 (0.88 to 1.05)                                 | 0.4     |
| Combined <=84ds                 | 25 / 91                 | 1.40 (0.86 to 2.26)                                 | 11 / 72                 | 0.70 (0.35 to 1.40)                                 | 1.11 (0.75 to 1.65)                                 | 0.6     |
| Combined >84ds                  | 112 / 782               | 0.77 (0.62 to 0.95)                                 | 53 / 249                | 0.97 (0.69 to 1.36)                                 | 0.82 (0.69 to 0.98)                                 | 0.03    |

CEE conjugated equine oestrogen; E2 oestradiol; MPA medroxyprogesterone acetate, NEA norethisterone acetate

\*Odds ratios are based on cases and controls matched by age and practice and adjusted for smoking status, body mass index, family history of VTE, chronic and recent medical events, other medications and past exposures to hormones.

*eTable 5 All cases and controls: Past use (91-365 days before the index date) of different oestrogen and progestogens, number of cases and controls and adjusted odds ratios by database and combined analysis*

|                          | QResearch               |                                                     | CPRD                    |                                                     | Combined analysis                                   |             |
|--------------------------|-------------------------|-----------------------------------------------------|-------------------------|-----------------------------------------------------|-----------------------------------------------------|-------------|
|                          | N of cases/<br>controls | Adjusted odds ratio<br>(95% confidence<br>interval) | N of cases/<br>controls | Adjusted odds ratio<br>(95% confidence<br>interval) | Combined odds ratio<br>(95% confidence<br>interval) | P-<br>value |
| Oral CEE                 | 309 / 1161              | 1.17 (0.96 to 1.44)                                 | 173 / 546               | 1.25 (0.94 to 1.65)                                 | 1.20 (1.02 to 1.41)                                 | 0.03        |
| Oral E2                  | 299 / 1294              | 1.04 (0.83 to 1.31)                                 | 190 / 635               | 1.24 (0.90 to 1.69)                                 | 1.11 (0.92 to 1.33)                                 | 0.3         |
| Oral MPA                 | 109 / 419               | 1.04 (0.78 to 1.39)                                 | 56 / 202                | 0.92 (0.61 to 1.39)                                 | 1.00 (0.79 to 1.27)                                 | 1           |
| Oral Norgestrel          | 101 / 407               | 0.87 (0.64 to 1.18)                                 | 59 / 185                | 0.99 (0.64 to 1.52)                                 | 0.91 (0.71 to 1.16)                                 | 0.4         |
| Oral Norethisterone      | 162 / 698               | 1.13 (0.85 to 1.52)                                 | 101 / 357               | 1.00 (0.68 to 1.49)                                 | 1.09 (0.86 to 1.37)                                 | 0.5         |
| Oral other progestogens  | 39 / 186                | 0.89 (0.59 to 1.36)                                 | 24 / 84                 | 1.15 (0.65 to 2.04)                                 | 0.97 (0.69 to 1.37)                                 | 0.9         |
| Transdermal E2           | 118 / 414               | 1.40 (1.07 to 1.84)                                 | 107 / 412               | 0.89 (0.67 to 1.18)                                 | 1.13 (0.93 to 1.37)                                 | 0.2         |
| Transdermal progestogens | 38 / 158                | 0.79 (0.49 to 1.26)                                 | 31 / 94                 | 1.76 (1.03 to 3.00)                                 | 1.12 (0.79 to 1.60)                                 | 0.5         |
| Raloxifene               | 22 / 69                 | 1.39 (0.82 to 2.37)                                 | 7 / 29                  | 0.98 (0.38 to 2.53)                                 | 1.28 (0.80 to 2.04)                                 | 0.3         |
| Tibolone                 | 67 / 296                | 0.98 (0.73 to 1.30)                                 | 50 / 154                | 1.31 (0.91 to 1.89)                                 | 1.09 (0.87 to 1.37)                                 | 0.4         |
| CEE cream                | 15 / 95                 | 0.86 (0.49 to 1.51)                                 | 11 / 68                 | 0.62 (0.31 to 1.23)                                 | 0.75 (0.48 to 1.16)                                 | 0.2         |
| E2 vaginal pessaries     | 65 / 289                | 1.07 (0.80 to 1.43)                                 | 117 / 449               | 1.17 (0.92 to 1.48)                                 | 1.13 (0.94 to 1.35)                                 | 0.2         |

CEE conjugated equine oestrogen; E2 oestradiol; MPA medroxyprogesterone acetate, NEA norethisterone acetate

\*Odds ratios are based on cases and controls matched by age and practice and adjusted for smoking status, body mass index, family history of VTE, chronic and recent medical events, other medications and current exposures to hormones.



eTable 6 Cases and controls without previous anticoagulant prescription: Numbers of cases and controls and adjusted odds ratios by database and combined odds ratios

|                                        | QRResearch              |                                | CPRD                    |                                | Combined analysis   |        |
|----------------------------------------|-------------------------|--------------------------------|-------------------------|--------------------------------|---------------------|--------|
|                                        | N of cases/<br>controls | Adjusted Odds ratio<br>(95%CI) | N of cases/<br>controls | Adjusted Odds ratio<br>(95%CI) |                     |        |
| Total N                                | 48765 \ 236295          |                                | 26757 \ 121918          |                                |                     |        |
| <b>ANY HRT</b>                         | 3647 \ 13612            | 1.48 (1.41 to 1.54)            | 1960 \ 6667             | 1.46 (1.37 to 1.55)            | 1.47 (1.42 to 1.53) | <0.001 |
| <b>ORAL PREPARATIONS</b>               | 3114 \ 10591            | 1.64 (1.57 to 1.72)            | 1659 \ 5293             | 1.59 (1.49 to 1.70)            | 1.63 (1.57 to 1.69) | <0.001 |
| <b>Oestrogen-only</b>                  |                         |                                |                         |                                |                     |        |
| CEE                                    | 758 \ 2509              | 1.54 (1.40 to 1.68)            | 406 \ 1236              | 1.48 (1.30 to 1.68)            | 1.52 (1.41 to 1.64) | <0.001 |
| E2                                     | 492 \ 1754              | 1.33 (1.19 to 1.49)            | 252 \ 865               | 1.21 (1.03 to 1.42)            | 1.29 (1.18 to 1.41) | <0.001 |
| <b>Combined with progestogen</b>       |                         |                                |                         |                                |                     |        |
| CEE MPA                                | 484 \ 1344              | 2.30 (2.06 to 2.58)            | 232 \ 688               | 1.95 (1.65 to 2.30)            | 2.19 (1.99 to 2.40) | <0.001 |
| CEE Norgestrel                         | 378 \ 1346              | 1.68 (1.48 to 1.90)            | 227 \ 624               | 2.10 (1.77 to 2.48)            | 1.81 (1.64 to 2.00) | <0.001 |
| E2 MPA                                 | 49 \ 184                | 1.72 (1.23 to 2.41)            | 24 \ 100                | 1.28 (0.79 to 2.10)            | 1.57 (1.19 to 2.07) | 0.002  |
| E2 Dydrogesterone                      | 98 \ 490                | 1.24 (0.98 to 1.56)            | 51 \ 245                | 1.19 (0.85 to 1.67)            | 1.22 (1.01 to 1.48) | 0.04   |
| E2 Norethisterone                      | 826 \ 2830              | 1.75 (1.61 to 1.91)            | 454 \ 1490              | 1.68 (1.48 to 1.89)            | 1.73 (1.61 to 1.85) | <0.001 |
| E2 other progestogens <sup>†</sup>     | 29 \ 134                | 1.38 (0.90 to 2.10)            | 13 \ 45                 | 1.69 (0.86 to 3.29)            | 1.46 (1.02 to 2.09) | 0.04   |
| <b>TRANSDERMAL PREPARATIONS</b>        | 606 \ 3264              | 0.92 (0.84 to 1.01)            | 323 \ 1432              | 0.98 (0.86 to 1.12)            | 0.94 (0.87 to 1.02) | 0.1    |
| E2 only                                | 476 \ 2455              | 0.95 (0.85 to 1.06)            | 264 \ 1128              | 1.01 (0.86 to 1.17)            | 0.97 (0.89 to 1.06) | 0.5    |
| E2 combined                            | 130 \ 809               | 0.83 (0.68 to 1.01)            | 59 \ 304                | 0.90 (0.66 to 1.23)            | 0.85 (0.72 to 1.00) | 0.06   |
| <b>OTHER ORAL MENOPAUSAL TREATMENT</b> |                         |                                |                         |                                |                     |        |
| Tibolone                               | 208 \ 1138              | 0.98 (0.84 to 1.15)            | 140 \ 596               | 1.08 (0.88 to 1.34)            | 1.02 (0.90 to 1.16) | 0.8    |
| Raloxifene                             | 112 \ 380               | 1.58 (1.25 to 1.99)            | 65 \ 187                | 1.64 (1.18 to 2.27)            | 1.60 (1.32 to 1.93) | <0.001 |

CEE conjugated equine oestrogen; E2 oestradiol; MPA medroxyprogesterone acetate

\*Odds ratios are based on cases and controls matched by age and practice and adjusted for smoking status, body mass index, family history of VTE, chronic and recent medical events, other medications and past exposures to hormones.

<sup>†</sup>other progestogens include norgestrel/levonorgestrel and drospirenone

eTable 7 Cases and controls with data linked to hospital, mortality and deprivation data: Numbers of cases and controls and adjusted odds ratios by database and combined odds ratios

|                                        | QRResearch              |                                | CPRD                    |                                | Combined analysis   |        |
|----------------------------------------|-------------------------|--------------------------------|-------------------------|--------------------------------|---------------------|--------|
|                                        | N of cases/<br>controls | Adjusted Odds ratio<br>(95%CI) | N of cases/<br>controls | Adjusted Odds ratio<br>(95%CI) |                     |        |
| Total N                                | 52137 / 259542          |                                | 16638 / 76114           |                                |                     |        |
| <b>ANY HRT</b>                         | 3769 / 14604            | 1.43 (1.37 to 1.50)            | 1280 / 4316             | 1.49 (1.38 to 1.61)            | 1.45 (1.39 to 1.50) | <0.001 |
| <b>ORAL PREPARATIONS</b>               | 3207 / 11338            | 1.59 (1.52 to 1.67)            | 1071 / 3468             | 1.58 (1.45 to 1.72)            | 1.59 (1.53 to 1.66) | <0.001 |
| <b>Oestrogen-only</b>                  |                         |                                |                         |                                |                     |        |
| CEE                                    | 786 / 2692              | 1.50 (1.37 to 1.64)            | 277 / 845               | 1.53 (1.31 to 1.79)            | 1.51 (1.39 to 1.63) | <0.001 |
| E2                                     | 511 / 1876              | 1.31 (1.17 to 1.46)            | 164 / 549               | 1.29 (1.06 to 1.57)            | 1.30 (1.19 to 1.43) | <0.001 |
| <b>Combined with progestogen</b>       |                         |                                |                         |                                |                     |        |
| CEE MPA                                | 501 / 1438              | 2.22 (1.99 to 2.48)            | 145 / 428               | 1.99 (1.61 to 2.46)            | 2.17 (1.97 to 2.39) | <0.001 |
| CEE Norgestrel                         | 382 / 1432              | 1.59 (1.41 to 1.80)            | 142 / 449               | 1.80 (1.46 to 2.21)            | 1.64 (1.48 to 1.83) | <0.001 |
| E2 MPA                                 | 49 / 197                | 1.56 (1.12 to 2.18)            | 16 / 66                 | 1.31 (0.72 to 2.40)            | 1.50 (1.12 to 2.01) | 0.006  |
| E2 Dydrogesterone                      | 101 / 520               | 1.19 (0.95 to 1.50)            | 31 / 159                | 1.05 (0.68 to 1.60)            | 1.16 (0.95 to 1.42) | 0.2    |
| E2 Norethisterone                      | 848 / 3043              | 1.69 (1.56 to 1.84)            | 286 / 945               | 1.64 (1.41 to 1.91)            | 1.68 (1.56 to 1.81) | <0.001 |
| E2 other progestogens <sup>†</sup>     | 29 / 140                | 1.34 (0.88 to 2.04)            | 10 / 27                 | 2.23 (1.00 to 4.97)            | 1.49 (1.03 to 2.17) | 0.03   |
| <b>TRANSDERMAL PREPARATIONS</b>        | 640 / 3519              | 0.92 (0.84 to 1.00)            | 227 / 876               | 1.14 (0.97 to 1.35)            | 0.96 (0.89 to 1.04) | 0.4    |
| E2 only                                | 503 / 2646              | 0.94 (0.85 to 1.04)            | 184 / 701               | 1.13 (0.94 to 1.36)            | 0.98 (0.90 to 1.08) | 0.7    |
| E2 combined                            | 137 / 873               | 0.84 (0.69 to 1.01)            | 43 / 175                | 1.20 (0.83 to 1.75)            | 0.90 (0.76 to 1.07) | 0.2    |
| <b>OTHER ORAL MENOPAUSAL TREATMENT</b> |                         |                                |                         |                                |                     |        |
| Tibolone                               | 224 / 1218              | 0.99 (0.85 to 1.16)            | 92 / 396                | 1.08 (0.83 to 1.39)            | 1.01 (0.89 to 1.16) | 0.8    |
| Raloxifene                             | 114 / 419               | 1.48 (1.18 to 1.86)            | 47 / 116                | 1.80 (1.22 to 2.67)            | 1.56 (1.28 to 1.89) | <0.001 |

CEE conjugated equine oestrogen; E2 oestradiol; MPA medroxyprogesterone acetate

\*Odds ratios are based on cases and controls matched by age and practice and adjusted for smoking status, body mass index, Townsend deprivation fifths, family history of VTE, chronic and recent medical events, other medications and past exposures to hormones.

<sup>†</sup>other progestogens include norgestrel/levonorgestrel and drospirenone

eTable 8 Cases and controls with complete data for body-mass index, smoking status and alcohol consumption: Numbers of cases and controls and adjusted odds ratios by database and combined odds ratios

|                                        | QResearch               |                                | CPRD                    |                                | Combined analysis   |        |
|----------------------------------------|-------------------------|--------------------------------|-------------------------|--------------------------------|---------------------|--------|
|                                        | N of cases/<br>controls | Adjusted Odds ratio<br>(95%CI) | N of cases/<br>controls | Adjusted Odds ratio<br>(95%CI) |                     |        |
| Total N                                | 41696 / 174639          |                                | 23306 / 92504           |                                |                     |        |
| <b>ANY HRT</b>                         | 2999 / 9461             | 1.42 (1.35 to 1.49)            | 1721 / 4927             | 1.50 (1.40 to 1.61)            | 1.45 (1.39 to 1.50) | <0.001 |
| <b>ORAL PREPARATIONS</b>               | 2555 / 7299             | 1.59 (1.50 to 1.68)            | 1461 / 3878             | 1.67 (1.55 to 1.79)            | 1.61 (1.55 to 1.69) | <0.001 |
| <b>Oestrogen-only</b>                  |                         |                                |                         |                                |                     |        |
| CEE                                    | 626 / 1708              | 1.52 (1.37 to 1.68)            | 358 / 872               | 1.63 (1.41 to 1.88)            | 1.56 (1.43 to 1.69) | <0.001 |
| E2                                     | 424 / 1270              | 1.29 (1.14 to 1.46)            | 221 / 630               | 1.29 (1.08 to 1.54)            | 1.29 (1.16 to 1.43) | <0.001 |
| <b>Combined with progestogen</b>       |                         |                                |                         |                                |                     |        |
| CEE MPA                                | 390 / 899               | 2.25 (1.98 to 2.57)            | 209 / 516               | 2.01 (1.67 to 2.41)            | 2.17 (1.95 to 2.41) | <0.001 |
| CEE Norgestrel                         | 276 / 864               | 1.52 (1.31 to 1.77)            | 197 / 451               | 2.12 (1.76 to 2.57)            | 1.79 (1.29 to 2.48) | <0.001 |
| E2 MPA                                 | 43 / 132                | 1.69 (1.17 to 2.45)            | 17 / 73                 | 1.17 (0.67 to 2.06)            | 1.52 (1.11 to 2.07) | 0.008  |
| E2 Dydrogesterone                      | 81 / 352                | 1.15 (0.89 to 1.50)            | 44 / 188                | 1.23 (0.85 to 1.76)            | 1.18 (0.95 to 1.46) | 0.1    |
| E2 Norethisterone                      | 692 / 1990              | 1.69 (1.54 to 1.87)            | 403 / 1118              | 1.71 (1.50 to 1.96)            | 1.70 (1.57 to 1.84) | <0.001 |
| E2 other progestogens <sup>†</sup>     | 23 / 84                 | 1.39 (0.85 to 2.26)            | 12 / 30                 | 1.93 (0.93 to 3.99)            | 1.53 (1.02 to 2.30) | 0.04   |
| <b>TRANSDERMAL PREPARATIONS</b>        | 510 / 2312              | 0.89 (0.80 to 0.99)            | 282 / 1090              | 0.95 (0.82 to 1.11)            | 0.91 (0.84 to 1.00) | 0.04   |
| E2 only                                | 398 / 1750              | 0.91 (0.81 to 1.03)            | 226 / 857               | 0.98 (0.83 to 1.16)            | 0.93 (0.85 to 1.03) | 0.2    |
| E2 combined                            | 112 / 562               | 0.83 (0.67 to 1.04)            | 56 / 233                | 0.86 (0.62 to 1.20)            | 0.84 (0.70 to 1.01) | 0.07   |
| <b>OTHER ORAL MENOPAUSAL TREATMENT</b> |                         |                                |                         |                                |                     |        |
| Tibolone                               | 177 / 781               | 0.99 (0.82 to 1.18)            | 119 / 463               | 1.05 (0.83 to 1.32)            | 1.01 (0.87 to 1.16) | 0.9    |
| Raloxifene                             | 91 / 273                | 1.58 (1.22 to 2.06)            | 50 / 151                | 1.32 (0.92 to 1.91)            | 1.49 (1.20 to 1.84) | <0.001 |

CEE conjugated equine oestrogen; E2 oestradiol; MPA medroxyprogesterone acetate

\*Odds ratios are based on cases and controls matched by age and practice and adjusted for smoking status, body mass index, family history of VTE, chronic and recent medical events, other medications and past exposures to hormones.

<sup>†</sup>other progestogens include norgestrel/levonorgestrel and drospirenone

eTable 9 Cases restricted to patients with a diagnosis of VTE on hospital or mortality records, or with associated anticoagulant prescriptions, and their controls: Numbers of cases and controls and adjusted odds ratios by database and combined odds ratios

|                                        | QResearch               |                                | CPRD                    |                                | Combined analysis   |        |
|----------------------------------------|-------------------------|--------------------------------|-------------------------|--------------------------------|---------------------|--------|
|                                        | N of cases/<br>controls | Adjusted Odds ratio<br>(95%CI) | N of cases/<br>controls | Adjusted Odds ratio<br>(95%CI) |                     |        |
| Total N                                | 39630 \ 197310          |                                | 9696 \ 44440            |                                |                     |        |
| <b>ANY HRT</b>                         | 2684 \ 10375            | 1.47 (1.39 to 1.55)            | 791 \ 2565              | 1.61 (1.46 to 1.79)            | 1.50 (1.43 to 1.57) | <0.001 |
| <b>ORAL PREPARATIONS</b>               | 2339 \ 8053             | 1.66 (1.58 to 1.76)            | 693 \ 2083              | 1.76 (1.58 to 1.97)            | 1.68 (1.60 to 1.77) | <0.001 |
| <b>Oestrogen-only</b>                  |                         |                                |                         |                                |                     |        |
| CEE                                    | 552 \ 1908              | 1.53 (1.38 to 1.70)            | 163 \ 504               | 1.53 (1.25 to 1.88)            | 1.53 (1.39 to 1.68) | <0.001 |
| E2                                     | 369 \ 1398              | 1.30 (1.14 to 1.47)            | 106 \ 331               | 1.49 (1.16 to 1.92)            | 1.33 (1.19 to 1.50) | <0.001 |
| <b>Combined with progestogen</b>       |                         |                                |                         |                                |                     |        |
| CEE MPA                                | 385 \ 1031              | 2.43 (2.13 to 2.76)            | 102 \ 263               | 2.37 (1.83 to 3.08)            | 2.42 (2.15 to 2.71) | <0.001 |
| CEE Norgestrel                         | 268 \ 937               | 1.75 (1.51 to 2.03)            | 86 \ 247                | 2.00 (1.51 to 2.63)            | 1.80 (1.58 to 2.05) | <0.001 |
| E2 MPA                                 | 35 \ 148                | 1.49 (1.00 to 2.20)            | 8 \ 39                  | 1.26 (0.54 to 2.93)            | 1.44 (1.01 to 2.06) | 0.04   |
| E2 Dydrogesterone                      | 69 \ 368                | 1.15 (0.87 to 1.51)            | 20 \ 90                 | 1.23 (0.72 to 2.11)            | 1.16 (0.91 to 1.49) | 0.2    |
| E2 Norethisterone                      | 646 \ 2167              | 1.82 (1.65 to 2.00)            | 201 \ 593               | 1.88 (1.56 to 2.27)            | 1.83 (1.68 to 2.00) | <0.001 |
| E2 other progestogens <sup>†</sup>     | 15 \ 96                 | 0.98 (0.56 to 1.74)            | 7 \ 16                  | 2.34 (0.87 to 6.33)            | 1.22 (0.74 to 1.99) | 0.4    |
| <b>TRANSDERMAL PREPARATIONS</b>        | 394 \ 2507              | 0.82 (0.73 to 0.92)            | 110 \ 500               | 1.02 (0.81 to 1.29)            | 0.85 (0.77 to 0.95) | 0.003  |
| E2 only                                | 304 \ 1887              | 0.83 (0.73 to 0.95)            | 85 \ 406                | 0.94 (0.72 to 1.23)            | 0.85 (0.76 to 0.96) | 0.008  |
| E2 combined                            | 90 \ 620                | 0.78 (0.61 to 0.98)            | 25 \ 94                 | 1.41 (0.85 to 2.32)            | 0.87 (0.70 to 1.07) | 0.2    |
| <b>OTHER ORAL MENOPAUSAL TREATMENT</b> |                         |                                |                         |                                |                     |        |
| Tibolone                               | 149 \ 874               | 0.95 (0.79 to 1.15)            | 47 \ 235                | 0.93 (0.65 to 1.32)            | 0.95 (0.80 to 1.12) | 0.5    |
| Raloxifene                             | 83 \ 335                | 1.32 (1.01 to 1.71)            | 31 \ 73                 | 2.08 (1.28 to 3.38)            | 1.46 (1.16 to 1.84) | 0.001  |

CEE conjugated equine oestrogen; E2 oestradiol; MPA medroxyprogesterone acetate

\*Odds ratios are based on cases and controls matched by age and practice and adjusted for smoking status, body mass index, family history of VTE, chronic and recent medical events, other medications and past exposures to hormones.

<sup>†</sup>other progestogens include norgestrel/levonorgestrel and drospirenone

eTable 10 Cases and controls without chronic conditions or recent medical events: Numbers of cases and controls and adjusted odds ratios by database and combined odds ratios

|                                        | QRResearch              |                                | CPRD                    |                                | Combined analysis   |        |
|----------------------------------------|-------------------------|--------------------------------|-------------------------|--------------------------------|---------------------|--------|
|                                        | N of cases/<br>controls | Adjusted Odds ratio<br>(95%CI) | N of cases/<br>controls | Adjusted Odds ratio<br>(95%CI) |                     |        |
| Total N                                | 17932 / 56747           |                                | 8839 / 25931            |                                |                     |        |
| <b>ANY HRT</b>                         | 1609 / 3757             | 1.62 (1.51 to 1.74)            | 810 / 1700              | 1.53 (1.38 to 1.70)            | 1.59 (1.50 to 1.69) | <0.001 |
| <b>ORAL PREPARATIONS</b>               | 1382 / 2980             | 1.77 (1.64 to 1.91)            | 715 / 1351              | 1.76 (1.58 to 1.96)            | 1.77 (1.66 to 1.88) | <0.001 |
| <b>Oestrogen-only</b>                  |                         |                                |                         |                                |                     |        |
| CEE                                    | 315 / 660               | 1.57 (1.35 to 1.82)            | 165 / 252               | 1.78 (1.42 to 2.22)            | 1.63 (1.44 to 1.85) | <0.001 |
| E2                                     | 191 / 449               | 1.35 (1.12 to 1.63)            | 101 / 239               | 1.06 (0.82 to 1.37)            | 1.25 (1.07 to 1.45) | 0.004  |
| <b>Combined with progestogen</b>       |                         |                                |                         |                                |                     |        |
| CEE MPA                                | 233 / 393               | 2.55 (2.13 to 3.04)            | 110 / 180               | 2.26 (1.74 to 2.94)            | 2.45 (2.12 to 2.84) | <0.001 |
| CEE Norgestrel                         | 194 / 457               | 1.84 (1.53 to 2.21)            | 110 / 171               | 2.73 (2.09 to 3.55)            | 2.09 (1.80 to 2.43) | <0.001 |
| E2 MPA                                 | 24 / 45                 | 2.09 (1.22 to 3.58)            | 14 / 34                 | 1.56 (0.79 to 3.09)            | 1.87 (1.23 to 2.85) | 0.004  |
| E2 Dydrogesterone                      | 44 / 145                | 1.21 (0.85 to 1.74)            | 21 / 68                 | 1.10 (0.65 to 1.86)            | 1.18 (0.87 to 1.58) | 0.3    |
| E2 Norethisterone                      | 369 / 790               | 1.96 (1.71 to 2.25)            | 189 / 393               | 1.81 (1.49 to 2.20)            | 1.91 (1.71 to 2.14) | <0.001 |
| E2 other progestogens <sup>†</sup>     | 12 / 41                 | 1.13 (0.57 to 2.23)            | 5 / 14                  | 1.37 (0.45 to 4.14)            | 1.19 (0.67 to 2.12) | 0.6    |
| <b>TRANSDERMAL PREPARATIONS</b>        | 259 / 853               | 1.04 (0.89 to 1.20)            | 105 / 363               | 0.78 (0.61 to 0.99)            | 0.95 (0.84 to 1.08) | 0.5    |
| E2 only                                | 195 / 612               | 1.05 (0.88 to 1.25)            | 84 / 276                | 0.79 (0.61 to 1.03)            | 0.96 (0.83 to 1.11) | 0.6    |
| E2 combined                            | 64 / 241                | 0.99 (0.74 to 1.32)            | 21 / 87                 | 0.74 (0.44 to 1.26)            | 0.92 (0.71 to 1.19) | 0.5    |
| <b>OTHER ORAL MENOPAUSAL TREATMENT</b> |                         |                                |                         |                                |                     |        |
| Tibolone                               | 75 / 319                | 0.84 (0.65 to 1.10)            | 48 / 144                | 1.11 (0.78 to 1.59)            | 0.93 (0.75 to 1.15) | 0.5    |
| Raloxifene                             | 28 / 70                 | 1.36 (0.85 to 2.18)            | 18 / 40                 | 1.20 (0.66 to 2.20)            | 1.30 (0.90 to 1.88) | 0.2    |

CEE conjugated equine oestrogen; E2 oestradiol; MPA medroxyprogesterone acetate

\*Odds ratios are based on cases and controls matched by age and practice and adjusted for smoking status, body mass index, family history of VTE, chronic and recent medical events, other medications and past exposures to hormones.

<sup>†</sup>other progestogens include norgestrel/levonorgestrel and drospirenone

eTable 11 Cases and controls aged 40 to 54: Numbers of cases and controls and adjusted odds ratios by database and combined odds ratios

|                                        | QResearch               |                                | CPRD                    |                                | Combined analysis                |         |
|----------------------------------------|-------------------------|--------------------------------|-------------------------|--------------------------------|----------------------------------|---------|
|                                        | N of cases/<br>controls | Adjusted Odds ratio<br>(95%CI) | N of cases/<br>controls | Adjusted Odds ratio<br>(95%CI) | Combined odds ratio (95% CI)     | P-value |
| Total N                                | 12128 / 60484           |                                | 6467 / 29463            |                                |                                  |         |
| <b>ANY HRT</b>                         | 1313 / 4759             | 1.42 (1.31 to 1.54)            | 697 / 2289              | 1.39 (1.24 to 1.55)            | 1.41 (1.32 to 1.50)              | <0.001  |
| <b>ORAL PREPARATIONS</b>               | 1125 / 3797             | 1.53 (1.41 to 1.66)            | 586 / 1842              | 1.51 (1.34 to 1.70)            | 1.52 (1.42 to 1.63)              | <0.001  |
| <b>Oestrogen-only</b>                  |                         |                                |                         |                                |                                  |         |
| CEE                                    | 245 / 668               | 1.63 (1.37 to 1.93)            | 121 / 320               | 1.52 (1.18 to 1.95)            | 1.59 (1.38 to 1.83)              | <0.001  |
| E2                                     | 234 / 735               | 1.27 (1.07 to 1.50)            | 125 / 360               | 1.26 (0.99 to 1.60)            | 1.26 (1.10 to 1.45)              | 0.001   |
| <b>Combined with progestogen</b>       |                         |                                |                         |                                |                                  |         |
| CEE MPA                                | 103 / 310               | 2.15 (1.67 to 2.77)            | 29 / 119                | 1.18 (0.73 to 1.89)            | 1.88 (1.51 to 2.35)              | <0.001  |
| CEE Norgestrel                         | 203 / 656               | 1.84 (1.54 to 2.21)            | 104 / 319               | 2.01 (1.57 to 2.59)            | 1.90 (1.64 to 2.20)              | <0.001  |
| E2 MPA                                 | 19 / 77                 | 1.49 (0.86 to 2.59)            | 12 / 57                 | 0.99 (0.49 to 1.98)            | 1.27 (0.82 to 1.96)              | 0.3     |
| E2 Dydrogesterone                      | 55 / 264                | 1.33 (0.97 to 1.85)            | 27 / 132                | 1.05 (0.65 to 1.69)            | 1.24 (0.95 to 1.62)              | 0.1     |
| E2 Norethisterone                      | 254 / 1030              | 1.39 (1.19 to 1.63)            | 163 / 509               | 1.69 (1.37 to 2.09)            | 1.49 (1.31 to 1.69)              | <0.001  |
| E2 other progestogens <sup>†</sup>     | 12 / 57                 | 1.38 (0.70 to 2.72)            | 5 / 26                  | 1.16 (0.42 to 3.19)            | 1.31 (0.74 to 2.30)              | 0.4     |
| <b>TRANSDERMAL PREPARATIONS</b>        | 236 / 1094              | 1.00 (0.85 to 1.17)            | 123 / 478               | 0.92 (0.72 to 1.16)            | 0.97 (0.85 to 1.11)              | 0.7     |
| E2 only                                | 184 / 769               | 1.05 (0.88 to 1.26)            | 98 / 361                | 0.92 (0.70 to 1.19)            | 1.01 (0.86 to 1.17)              | 0.9     |
| E2 combined                            | 52 / 325                | 0.88 (0.64 to 1.22)            | 25 / 117                | 0.94 (0.56 to 1.57)            | 0.90 (0.68 to 1.18)              | 0.4     |
| <b>OTHER ORAL MENOPAUSAL TREATMENT</b> |                         |                                |                         |                                |                                  |         |
| Tibolone                               | 51 / 194                | 1.11 (0.78 to 1.59)            | 38 / 101                | 1.75 (1.13 to 2.71)            | 1.33 (1.01 to 1.75)              | 0.04    |
| Raloxifene                             | 7 / 15                  | 3.11 (1.15 to 8.46)            | <5 cases                | N/A                            | 3.11 (1.15 to 8.46) <sup>Q</sup> | 0.05    |

CEE conjugated equine oestrogen; E2 oestradiol; MPA medroxyprogesterone acetate

\*Odds ratios are based on cases and controls matched by age and practice and adjusted for smoking status, body mass index, family history of VTE, chronic and recent medical events, other medications and past exposures to hormones.

<sup>†</sup>other progestogens include norgestrel/levonorgestrel and drospirenone

<sup>Q</sup> Results based on QResearch analysis only

eTable 12 Cases and controls aged 55 to 64: Numbers of cases and controls and adjusted odds ratios by database and combined odds ratios

|                                        | QRsearch                |                                | CPRD                    |                                | Combined analysis            |         |
|----------------------------------------|-------------------------|--------------------------------|-------------------------|--------------------------------|------------------------------|---------|
|                                        | N of cases/<br>controls | Adjusted Odds ratio<br>(95%CI) | N of cases/<br>controls | Adjusted Odds ratio<br>(95%CI) | Combined odds ratio (95% CI) | P-value |
| Total N                                | 11721 / 58392           |                                | 6566 / 30652            |                                |                              |         |
| <b>ANY HRT</b>                         | 1552 / 6125             | 1.49 (1.38 to 1.60)            | 874 / 3071              | 1.53 (1.38 to 1.69)            | 1.50 (1.42 to 1.59)          | <0.001  |
| <b>ORAL PREPARATIONS</b>               | 1335 / 4771             | 1.69 (1.57 to 1.82)            | 759 / 2473              | 1.68 (1.52 to 1.87)            | 1.69 (1.59 to 1.80)          | <0.001  |
| <b>Oestrogen-only</b>                  |                         |                                |                         |                                |                              |         |
| CEE                                    | 292 / 1083              | 1.35 (1.16 to 1.56)            | 179 / 541               | 1.49 (1.22 to 1.83)            | 1.40 (1.24 to 1.57)          | <0.001  |
| E2                                     | 181 / 720               | 1.24 (1.03 to 1.49)            | 95 / 366                | 1.17 (0.89 to 1.53)            | 1.22 (1.05 to 1.42)          | 0.01    |
| <b>Combined with progestogen</b>       |                         |                                |                         |                                |                              |         |
| CEE MPA                                | 254 / 703               | 2.54 (2.16 to 2.99)            | 138 / 404               | 2.02 (1.61 to 2.53)            | 2.35 (2.06 to 2.68)          | <0.001  |
| CEE Norgestrel                         | 124 / 546               | 1.50 (1.21 to 1.85)            | 85 / 249                | 2.06 (1.56 to 2.74)            | 1.68 (1.42 to 2.00)          | <0.001  |
| E2 MPA                                 | 21 / 88                 | 1.77 (1.05 to 3.00)            | 9 / 38                  | 1.47 (0.66 to 3.28)            | 1.68 (1.08 to 2.60)          | 0.02    |
| E2 Dydrogesterone                      | 31 / 192                | 1.07 (0.71 to 1.62)            | 19 / 97                 | 1.26 (0.73 to 2.18)            | 1.14 (0.82 to 1.58)          | 0.4     |
| E2 Norethisterone                      | 420 / 1387              | 2.05 (1.81 to 2.33)            | 228 / 763               | 1.88 (1.58 to 2.24)            | 1.99 (1.80 to 2.21)          | <0.001  |
| E2 other progestogens <sup>†</sup>     | 12 / 52                 | 1.46 (0.75 to 2.85)            | 6 / 15                  | 2.40 (0.82 to 7.01)            | 1.68 (0.95 to 2.96)          | 0.07    |
| <b>TRANSDERMAL PREPARATIONS</b>        | 235 / 1445              | 0.82 (0.70 to 0.96)            | 123 / 619               | 0.92 (0.73 to 1.15)            | 0.85 (0.75 to 0.97)          | 0.01    |
| E2 only                                | 183 / 1072              | 0.82 (0.69 to 0.98)            | 94 / 472                | 0.91 (0.71 to 1.18)            | 0.85 (0.74 to 0.98)          | 0.03    |
| E2 combined                            | 52 / 373                | 0.77 (0.56 to 1.06)            | 29 / 147                | 0.92 (0.58 to 1.45)            | 0.81 (0.63 to 1.06)          | 0.1     |
| <b>OTHER ORAL MENOPAUSAL TREATMENT</b> |                         |                                |                         |                                |                              |         |
| Tibolone                               | 98 / 509                | 1.16 (0.91 to 1.47)            | 65 / 290                | 1.02 (0.74 to 1.41)            | 1.11 (0.91 to 1.34)          | 0.3     |
| Raloxifene                             | 25 / 92                 | 1.28 (0.78 to 2.12)            | 17 / 55                 | 1.41 (0.74 to 2.68)            | 1.33 (0.89 to 1.97)          | 0.2     |

CEE conjugated equine oestrogen; E2 oestradiol; MPA medroxyprogesterone acetate

\*Odds ratios are based on cases and controls matched by age and practice and adjusted for smoking status, body mass index, family history of VTE, chronic and recent medical events, other medications and past exposures to hormones.

<sup>†</sup>other progestogens include norgestrel/levonorgestrel and drospirenone

eTable 13 Cases and controls aged 65 to 79: Numbers of cases and controls and adjusted odds ratios by database and combined odds ratios

|                                        | QResearch               |                                | CPRD                    |                                | Combined analysis                |         |
|----------------------------------------|-------------------------|--------------------------------|-------------------------|--------------------------------|----------------------------------|---------|
|                                        | N of cases/<br>controls | Adjusted Odds ratio<br>(95%CI) | N of cases/<br>controls | Adjusted Odds ratio<br>(95%CI) | Combined odds ratio (95% CI)     | P-value |
| Total N                                | 28288 / 140666          |                                | 15226 / 71837           |                                |                                  |         |
| <b>ANY HRT</b>                         | 904 / 3720              | 1.38 (1.27 to 1.50)            | 455 / 1706              | 1.38 (1.22 to 1.55)            | 1.38 (1.29 to 1.47)              | <0.001  |
| <b>ORAL PREPARATIONS</b>               | 747 / 2770              | 1.55 (1.42 to 1.70)            | 363 / 1285              | 1.49 (1.30 to 1.70)            | 1.53 (1.42 to 1.65)              | <0.001  |
| <b>Oestrogen-only</b>                  |                         |                                |                         |                                |                                  |         |
| CEE                                    | 249 / 941               | 1.45 (1.24 to 1.68)            | 122 / 447               | 1.37 (1.10 to 1.71)            | 1.42 (1.26 to 1.61)              | <0.001  |
| E2                                     | 96 / 421                | 1.18 (0.93 to 1.50)            | 40 / 179                | 0.90 (0.61 to 1.32)            | 1.10 (0.90 to 1.35)              | 0.4     |
| <b>Combined with progestogen</b>       |                         |                                |                         |                                |                                  |         |
| CEE MPA                                | 144 / 425               | 2.02 (1.65 to 2.48)            | 72 / 209                | 2.15 (1.60 to 2.88)            | 2.06 (1.74 to 2.44)              | <0.001  |
| CEE Norgestrel                         | 55 / 230                | 1.44 (1.05 to 1.96)            | 43 / 107                | 2.36 (1.61 to 3.46)            | 1.75 (1.37 to 2.22)              | <0.001  |
| E2 MPA                                 | 9 / 32                  | 1.82 (0.84 to 3.96)            | <5 cases                | N/A                            | 1.82 (0.84 to 3.96) <sup>Q</sup> | 0.1     |
| E2 Dydrogesterone                      | 15 / 64                 | 1.63 (0.90 to 2.94)            | 5 / 30                  | 1.25 (0.46 to 3.40)            | 1.52 (0.92 to 2.53)              | 0.1     |
| E2 Norethisterone                      | 174 / 626               | 1.70 (1.42 to 2.04)            | 76 / 298                | 1.33 (1.00 to 1.78)            | 1.59 (1.36 to 1.85)              | <0.001  |
| E2 other progestogens <sup>†</sup>     | 5 / 31                  | 1.20 (0.45 to 3.18)            | <5 cases                | N/A                            | 1.20 (0.45 to 3.18) <sup>Q</sup> | 0.2     |
| <b>TRANSDERMAL PREPARATIONS</b>        | 169 / 980               | 0.92 (0.78 to 1.10)            | 96 / 428                | 1.07 (0.83 to 1.36)            | 0.97 (0.84 to 1.12)              | 0.7     |
| E2 only                                | 136 / 805               | 0.90 (0.74 to 1.09)            | 86 / 371                | 1.09 (0.84 to 1.41)            | 0.96 (0.82 to 1.12)              | 0.6     |
| E2 combined                            | 33 / 175                | 1.02 (0.69 to 1.52)            | 10 / 57                 | 0.92 (0.44 to 1.89)            | 1.00 (0.70 to 1.41)              | 1       |
| <b>OTHER ORAL MENOPAUSAL TREATMENT</b> |                         |                                |                         |                                |                                  |         |
| Tibolone                               | 75 / 515                | 0.77 (0.60 to 0.99)            | 41 / 250                | 0.82 (0.57 to 1.18)            | 0.79 (0.64 to 0.97)              | 0.02    |
| Raloxifene                             | 82 / 312                | 1.43 (1.10 to 1.86)            | 47 / 147                | 1.51 (1.04 to 2.20)            | 1.46 (1.18 to 1.81)              | <0.001  |

CEE conjugated equine oestrogen; E2 oestradiol; MPA medroxyprogesterone acetate

\*Odds ratios are based on cases and controls matched by age and practice and adjusted for smoking status, body mass index, family history of VTE, chronic and recent medical events, other medications and past exposures to hormones.

<sup>†</sup>other progestogens include norgestrel/levonorgestrel and drospirenone

<sup>Q</sup> Results based on QResearch analysis only



eTable 14 Cases and controls with body mass index < 25kg/m<sup>2</sup>: Numbers of cases and controls and adjusted odds ratios by database and combined odds ratios

|                                        | QResearch               |                                | CPRD                    |                                | Combined analysis                |         |
|----------------------------------------|-------------------------|--------------------------------|-------------------------|--------------------------------|----------------------------------|---------|
|                                        | N of cases/<br>controls | Adjusted Odds ratio<br>(95%CI) | N of cases/<br>controls | Adjusted Odds ratio<br>(95%CI) | Combined odds ratio (95% CI)     | P-value |
| Total N                                | 11160 / 22954           |                                | 5955 / 11539            |                                |                                  |         |
| <b>ANY HRT</b>                         | 1011 / 1602             | 1.41 (1.27 to 1.56)            | 493 / 800               | 1.34 (1.15 to 1.55)            | 1.39 (1.27 to 1.51)              | <0.001  |
| <b>ORAL PREPARATIONS</b>               | 850 / 1246              | 1.51 (1.35 to 1.69)            | 421 / 648               | 1.48 (1.26 to 1.74)            | 1.50 (1.37 to 1.64)              | <0.001  |
| <b>Oestrogen-only</b>                  |                         |                                |                         |                                |                                  |         |
| CEE                                    | 181 / 274               | 1.24 (0.99 to 1.55)            | 97 / 142                | 1.24 (0.91 to 1.70)            | 1.24 (1.04 to 1.49)              | 0.02    |
| E2                                     | 110 / 172               | 1.17 (0.88 to 1.55)            | 49 / 93                 | 0.94 (0.62 to 1.43)            | 1.09 (0.86 to 1.38)              | 0.5     |
| <b>Combined with progestogen</b>       |                         |                                |                         |                                |                                  |         |
| CEE MPA                                | 137 / 151               | 2.15 (1.64 to 2.81)            | 68 / 94                 | 2.18 (1.50 to 3.17)            | 2.16 (1.74 to 2.68)              | <0.001  |
| CEE Norgestrel                         | 122 / 167               | 1.76 (1.34 to 2.32)            | 60 / 88                 | 1.98 (1.35 to 2.89)            | 1.83 (1.47 to 2.29)              | <0.001  |
| E2 MPA                                 | 15 / 23                 | 1.65 (0.80 to 3.41)            | 5 / 13                  | 0.67 (0.21 to 2.09)            | 1.27 (0.69 to 2.35)              | 0.4     |
| E2 Dydrogesterone                      | 34 / 82                 | 1.09 (0.70 to 1.69)            | 20 / 29                 | 1.61 (0.82 to 3.19)            | 1.22 (0.84 to 1.76)              | 0.3     |
| E2 Norethisterone                      | 240 / 358               | 1.65 (1.37 to 2.00)            | 120 / 182               | 1.57 (1.18 to 2.09)            | 1.63 (1.39 to 1.91)              | <0.001  |
| E2 other progestogens <sup>†</sup>     | 11 / 19                 | 1.34 (0.59 to 3.00)            | <5 cases                | N/A                            | 1.34 (0.59 to 3.00) <sup>Q</sup> | 0.7     |
| <b>TRANSDERMAL PREPARATIONS</b>        | 180 / 380               | 1.05 (0.85 to 1.30)            | 81 / 164                | 0.86 (0.63 to 1.19)            | 0.99 (0.83 to 1.18)              | 0.9     |
| E2 only                                | 133 / 269               | 1.06 (0.83 to 1.36)            | 62 / 108                | 1.02 (0.70 to 1.48)            | 1.05 (0.85 to 1.29)              | 0.7     |
| E2 combined                            | 47 / 111                | 1.02 (0.69 to 1.50)            | 19 / 56                 | 0.56 (0.30 to 1.04)            | 0.86 (0.62 to 1.20)              | 0.4     |
| <b>OTHER ORAL MENOPAUSAL TREATMENT</b> |                         |                                |                         |                                |                                  |         |
| Tibolone                               | 61 / 115                | 1.23 (0.86 to 1.76)            | 34 / 63                 | 1.07 (0.65 to 1.76)            | 1.17 (0.87 to 1.57)              | 0.3     |
| Raloxifene                             | 41 / 60                 | 1.19 (0.74 to 1.90)            | 22 / 20                 | 2.00 (0.97 to 4.13)            | 1.39 (0.94 to 2.06)              | 0.1     |

CEE conjugated equine oestrogen; E2 oestradiol; MPA medroxyprogesterone acetate

\*Odds ratios are based on cases and controls matched by age and practice and adjusted for smoking status, body mass index, family history of VTE, chronic and recent medical events, other medications and past exposures to hormones.

<sup>†</sup>other progestogens include norgestrel/levonorgestrel and drospirenone

<sup>Q</sup> Results based on QResearch analysis only

eTable 15 Cases and controls with body mass index 25 to 30kg/m<sup>2</sup>: Numbers of cases and controls and adjusted odds ratios by database and combined odds ratios

|                                        | QResearch               |                                | CPRD                    |                                | Combined analysis                |         |
|----------------------------------------|-------------------------|--------------------------------|-------------------------|--------------------------------|----------------------------------|---------|
|                                        | N of cases/<br>controls | Adjusted Odds ratio<br>(95%CI) | N of cases/<br>controls | Adjusted Odds ratio<br>(95%CI) | Combined odds ratio (95% CI)     | P-value |
| Total N                                | 11600 / 21056           |                                | 6923 / 12529            |                                |                                  |         |
| <b>ANY HRT</b>                         | 906 / 1127              | 1.58 (1.42 to 1.76)            | 534 / 668               | 1.59 (1.37 to 1.84)            | 1.58 (1.45 to 1.73)              | <0.001  |
| <b>ORAL PREPARATIONS</b>               | 772 / 850               | 1.82 (1.61 to 2.05)            | 453 / 526               | 1.75 (1.49 to 2.06)            | 1.79 (1.63 to 1.97)              | <0.001  |
| <b>Oestrogen-only</b>                  |                         |                                |                         |                                |                                  |         |
| CEE                                    | 202 / 192               | 2.03 (1.61 to 2.55)            | 118 / 123               | 1.89 (1.40 to 2.56)            | 1.98 (1.65 to 2.37)              | <0.001  |
| E2                                     | 121 / 151               | 1.41 (1.07 to 1.86)            | 68 / 87                 | 1.52 (1.04 to 2.21)            | 1.45 (1.16 to 1.81)              | 0.001   |
| <b>Combined with progestogen</b>       |                         |                                |                         |                                |                                  |         |
| CEE MPA                                | 123 / 131               | 2.40 (1.80 to 3.18)            | 70 / 64                 | 2.63 (1.75 to 3.97)            | 2.47 (1.96 to 3.12)              | <0.001  |
| CEE Norgestrel                         | 76 / 92                 | 1.62 (1.15 to 2.29)            | 57 / 67                 | 1.90 (1.25 to 2.88)            | 1.73 (1.33 to 2.26)              | <0.001  |
| E2 MPA                                 | 16 / 23                 | 1.49 (0.72 to 3.10)            | 7 / 7                   | 3.27 (1.03 to 10.40)           | 1.87 (1.01 to 3.46)              | 0.05    |
| E2 Dydrogesterone                      | 25 / 34                 | 1.71 (0.95 to 3.06)            | 11 / 24                 | 0.82 (0.34 to 1.95)            | 1.36 (0.84 to 2.21)              | 0.2     |
| E2 Norethisterone                      | 203 / 214               | 1.80 (1.45 to 2.24)            | 120 / 152               | 1.48 (1.10 to 1.98)            | 1.68 (1.41 to 2.00)              | <0.001  |
| E2 other progestogens <sup>†</sup>     | 6 / 13                  | 1.01 (0.34 to 2.99)            | <5 cases                | N/A                            | 1.01 (0.34 to 2.99) <sup>Q</sup> | 0.8     |
| <b>TRANSDERMAL PREPARATIONS</b>        | 154 / 296               | 0.89 (0.71 to 1.11)            | 83 / 146                | 0.99 (0.72 to 1.37)            | 0.92 (0.77 to 1.11)              | 0.4     |
| E2 only                                | 123 / 235               | 0.87 (0.67 to 1.11)            | 68 / 131                | 0.87 (0.61 to 1.24)            | 0.87 (0.71 to 1.06)              | 0.2     |
| E2 combined                            | 31 / 61                 | 0.97 (0.59 to 1.60)            | 15 / 15                 | 2.41 (1.03 to 5.64)            | 1.23 (0.80 to 1.89)              | 0.4     |
| <b>OTHER ORAL MENOPAUSAL TREATMENT</b> |                         |                                |                         |                                |                                  |         |
| Tibolone                               | 41 / 116                | 0.62 (0.42 to 0.93)            | 38 / 62                 | 1.25 (0.77 to 2.05)            | 0.82 (0.60 to 1.12)              | 0.2     |
| Raloxifene                             | 21 / 36                 | 0.94 (0.51 to 1.73)            | 16 / 15                 | 1.86 (0.81 to 4.26)            | 1.19 (0.73 to 1.95)              | 0.5     |

CEE conjugated equine oestrogen; E2 oestradiol; MPA medroxyprogesterone acetate

\*Odds ratios are based on cases and controls matched by age and practice and adjusted for smoking status, body mass index, family history of VTE, chronic and recent medical events, other medications and past exposures to hormones.

<sup>†</sup>other progestogens include norgestrel/levonorgestrel and drospirenone

<sup>Q</sup> Results based on QResearch analysis only

eTable 16 Cases and controls with body mass index > 30kg/m<sup>2</sup>: Numbers of cases and controls and adjusted odds ratios by database and combined odds ratios

|                                        | QRResearch              |                                | CPRD                    |                                | Combined analysis            |         |
|----------------------------------------|-------------------------|--------------------------------|-------------------------|--------------------------------|------------------------------|---------|
|                                        | N of cases/<br>controls | Adjusted Odds ratio<br>(95%CI) | N of cases/<br>controls | Adjusted Odds ratio<br>(95%CI) | Combined odds ratio (95% CI) | P-value |
| Total N                                | 13254 / 22034           |                                | 7053 / 11305            |                                |                              |         |
| <b>ANY HRT</b>                         | 686 / 837               | 1.46 (1.29 to 1.65)            | 402 / 444               | 1.59 (1.34 to 1.89)            | 1.50 (1.36 to 1.66)          | <0.001  |
| <b>ORAL PREPARATIONS</b>               | 590 / 655               | 1.60 (1.40 to 1.83)            | 333 / 344               | 1.75 (1.46 to 2.11)            | 1.65 (1.48 to 1.84)          | <0.001  |
| <b>Oestrogen-only</b>                  |                         |                                |                         |                                |                              |         |
| CEE                                    | 148 / 164               | 1.50 (1.16 to 1.94)            | 84 / 92                 | 1.33 (0.93 to 1.90)            | 1.44 (1.17 to 1.78)          | <0.001  |
| E2                                     | 124 / 156               | 1.29 (0.99 to 1.69)            | 62 / 74                 | 1.40 (0.95 to 2.07)            | 1.32 (1.06 to 1.65)          | 0.01    |
| <b>Combined with progestogen</b>       |                         |                                |                         |                                |                              |         |
| CEE MPA                                | 82 / 72                 | 2.22 (1.55 to 3.17)            | 43 / 32                 | 3.59 (2.12 to 6.06)            | 2.58 (1.92 to 3.46)          | <0.001  |
| CEE Norgestrel                         | 50 / 67                 | 1.42 (0.95 to 2.13)            | 36 / 36                 | 1.75 (1.04 to 2.94)            | 1.54 (1.12 to 2.11)          | 0.008   |
| E2 MPA                                 | 6 / 11                  | 0.91 (0.31 to 2.65)            | 5 / 6                   | 1.66 (0.45 to 6.09)            | 1.16 (0.51 to 2.64)          | 0.7     |
| E2 Dydrogesterone                      | 16 / 33                 | 0.90 (0.46 to 1.74)            | 9 / 13                  | 1.24 (0.48 to 3.19)            | 1.00 (0.58 to 1.72)          | 1       |
| E2 Norethisterone                      | 159 / 150               | 2.07 (1.60 to 2.68)            | 89 / 89                 | 2.05 (1.45 to 2.90)            | 2.06 (1.68 to 2.54)          | <0.001  |
| E2 other progestogens <sup>†</sup>     | <5 cases                | N/A                            | <5 cases                | N/A                            | N/A                          |         |
| <b>TRANSDERMAL PREPARATIONS</b>        | 109 / 195               | 0.95 (0.73 to 1.24)            | 75 / 106                | 0.98 (0.69 to 1.40)            | 0.96 (0.78 to 1.19)          | 0.7     |
| E2 only                                | 89 / 152                | 1.02 (0.76 to 1.37)            | 59 / 82                 | 1.04 (0.69 to 1.56)            | 1.02 (0.81 to 1.30)          | 0.8     |
| E2 combined                            | 20 / 43                 | 0.70 (0.38 to 1.28)            | 16 / 24                 | 0.79 (0.37 to 1.70)            | 0.73 (0.45 to 1.18)          | 0.2     |
| <b>OTHER ORAL MENOPAUSAL TREATMENT</b> |                         |                                |                         |                                |                              |         |
| Tibolone                               | 56 / 83                 | 1.03 (0.69 to 1.52)            | 31 / 31                 | 1.79 (0.99 to 3.22)            | 1.22 (0.88 to 1.69)          | 0.2     |
| Raloxifene                             | 12 / 15                 | 1.32 (0.56 to 3.12)            | 10 / 11                 | 1.43 (0.51 to 4.05)            | 1.37 (0.70 to 2.65)          | 0.4     |

CEE conjugated equine oestrogen; E2 oestradiol; MPA medroxyprogesterone acetate

\*Odds ratios are based on cases and controls matched by age and practice and adjusted for smoking status, body mass index, family history of VTE, chronic and recent medical events, other medications and past exposures to hormones.

<sup>†</sup>other progestogens include norgestrel/levonorgestrel and drospirenone
